# Supplementary material for: Functional macrophyte trait variation as a response to the source of inorganic carbon acquisition
Source: PeerJ. 2021 Dec 1;9:e12584. doi: 10.7717/peerj.12584 (PMC8643105; doi:10.7717/peerj.12584)
Supplement: Supplemental Information 3 [file peerj-09-12584-s003.xlsx]

## Sheet: R
Lake	pH_w	Conductivity_w	Ca_w	Ptot._w	Ntot._w	PAR	Visibility	Depth
Kocioł	4.18	26.3357	0.83	0.00705	1.10928	29.21	7.5	4
Dobrogoszcz	6.94	86.1385	8.98353	0.061663	1.03057	17.6151	3.08065	2.77419
Gacno Wielkie	4.55	47.24	2.2	0.1002	1.286	21.04	4	3
Krasne	5.8985	30.325	2.68307	0.0598281	0.747038	14.7607	2.65	2.625
Czarne near Laska	5.88	20.95	1.9038	0.0571255	0.997	28.1	5.5	1.5
Moczadło near Męcikał	4.85333	34.5111	2.44488	0.0287972	0.326333	23.0547	6	3
Jeleń	7.06126	57.4249	7.35493	0.0454659	1.23364	10.0807	4.8	4.49562
Piasek	6.4875	41.6625	3.265	0.0467518	1.06412	16.125	6	4.5
Kiedrowickie	6.55333	79.6667	13.1867	0.0904667	1.91067	16.7773	3.5	2.16667
Kamień	6.66	84.95	8.68	0.08805	2.776	7.85	2	1.5
Okońskie	5.93	36.5	3.13	0.070099	1.768	5.4	1.1	1
Smołowe	5.98426	28.5787	2.97328	0.0659646	1.11428	8.23607	3.5	2.06885
Gubisz	6.48817	53.281	5.76462	0.111939	2.28114	10.8831	2.5	4.46095
Sporacz	5.37455	23.4727	1.55273	0.0677601	0.839	5.35455	3.5	1.90909
Kiełpino	4.8625	46.4	3.0125	0.0971875	1.46913	6.58125	1	1.4375
Linowskie	5.93329	23.0734	3.32923	0.0494286	1.01122	15.0357	2.3	1.57143
Sierzywk	9.00727	34.7273	6.72273	0.0641364	1.71974	35.3818	1	1.09091
Sitno	6.995	173	17.7175	0.34625	1.2175	10.65	2	2.5
Otalżyno	7.64	91	9.78	0.10945	1.795	5.95	1	1.5
Dolskie	7.65	114.714	13.2643	0.0994429	1.67286	14.7286	2.2	4
Nawionek	7.65571	52.7571	8.15429	0.137714	0.7159	24.01	6	4
Okoń Duży	7.135	39.5	5.12	0.1545	0.969075	24.3	3.9	2.5
Bobięciono Wielkie	6.692	37.44	4.17	0.2148	0.67876	19.06	3.9	3
Czarne Dąbrówno	7.78571	49	7.91857	0.159286	0.773014	20.7143	5.75	4
Moczadło near Sulęczyno	7.83	50	8.29	0.0826667	0.961267	23.3333	3.5	2
Zawiat	6.738	35.6	4.202	0.03312	0.65874	15.28	4.25	3
Zakrzewie	8.544	65	11.948	0.2586	0.80456	34.58	5	3
Miemino	8.19	68.5	10.08	0.217	1.5901	9.6	1	1.5
Karlikowskie	7.71	45.5	5.87	0.1995	2.0325	13.25	1	1.5
Małe Łowne	5.51692	25.1692	1.52304	0.133038	0.581869	10.9	2	2.15385

## Sheet: L
Lake/macrophyte abundance	Chara virgata	Chara globularis	Nitella flexilis	Nitellopsis obtusa	Drepanocladus sordidus	Fontinalis antipyretica	Fontinalis dalecarlica	Sphagnum cuspidatum	Sphagnum denticulatum	Warnstorfia exannulata	Ceratophyllum demersum	Eleocharis acicularis	Elodea canadensis	Isoëtes lacustris	Juncus bulbosus	Littorella uniflora	Lobelia dortmanna	Luronium natans	Myriophyllum alterniflorum	Myriophyllum spicatum	Nuphar lutea	Polygonum amphibium	Potamogeton crispus	Potamogeton gramineus	Potamogeton natans	Potamogeton x nitens	Potamogeton obtusifolius	Stuckenia pectinata	Ranunculus reptans	Sparganium angustifolium
Kocioł	0	0	0	0	0	0	0	0	87.8	0	0	0	0	0	0	0	0	0	0	0	0	0	0	0	0	0	0	0	0	0
Dobrogoszcz	24.1365	40.7373	11.6774	0	10.6838	1	0	0	0	0	2.45455	0	18.7732	35.3024	0	48.9451	25.5242	27.359	25.3601	0	0	11.9048	3.625	0	0	0	7.72727	0	2	0
Gacno Wielkie	0	0	0	0	0	0	0	0	6.82292	4.43011	0	0	0	3.45	4.21739	0	2.0625	1	0	0	0	0	0	0	0	0	0	0	0	0
Krasne	0	0	0	0	0	0	0	0	27.088	9.8125	0	10	0	32.0526	19.2945	28.7059	19.5282	46.5123	8.33333	0	5	0	0	0	0	0	0	0	0	0
Czarne near Laska	0	0	0	0	0	0	0	0	8.75	0	0	0	0	51.7692	0	0	42.925	0	0	0	0	0	0	0	0	0	0	0	0	6.66667
Moczadło near Męcikał	0	0	0	0	0	7.40476	0	0	20.3103	0	0	0	0	49.3543	18.1481	0	55.2151	38.3333	0	0	0	0	0	0	0	0	0	0	0	16
Jeleń	12.3529	5	0	30.2174	19.8909	17.9134	11	0	0	0	8.10606	0	18.5306	56.1063	30	29.403	18.8816	0	22.2291	0	0	0	0	0	0	0	0	0	0	0
Piasek	0	0	0	0	13.8426	16.6925	19.8194	0	5	7.98214	0	0	0	76.4189	0	22.093	34.6154	36.1111	13.8041	0	0	0	0	0	37.5	0	0	0	0	0
Kiedrowickie	17.3387	0	0	0	0	0	0	0	0	0	0	0	34.0625	22.3006	0	43.4375	22.2549	0	41.8579	0	0	0	0	0	0	42.0055	0	0	0	0
Kamień	0	0	0	0	0	12.5	0	0	0	0	0	0	10.7955	43.1214	0	21.087	25.8	0	29.3197	0	0	0	18.4821	0	0	0	0	0	0	9.16667
Okońskie	0	0	0	0	6.66667	0	30.5556	0	0	0	0	0	0	39.8969	0	10.5556	5.5	0	0	0	0	0	0	0	0	0	0	0	0	0
Smołowe	0	0	0	0	0	10	0	5	14.4886	12.3899	0	0	0	63.3267	5	50.6757	24.8837	16.4706	0	0	0	0	0	0	0	0	0	0	0	0
Gubisz	0	8.71212	0	0	8.14754	16.4451	0	0	0	0	0	0	11.4901	21.1672	7.5	16.6667	15.7456	0	16.8	0	0	7.5	0	0	0	0	0	0	0	0
Sporacz	0	0	0	0	0	0	0	0	25.056	19.2308	0	0	0	50.1381	0	0	62.0339	52	0	0	0	0	0	0	0	0	0	0	0	0
Kiełpino	0	0	0	0	0	0	0	0	0	0	0	0	0	13.1776	0	8.93443	10	0	0	0	0	0	0	0	0	0	0	0	0	10
Linowskie	0	0	0	0	0	0	0	0	23.7069	0	0	0	0	46.8862	55.25	0	39.8876	27.6168	0	0	13.6184	0	0	0	0	0	0	0	0	0
Sierzywk	0	0	0	0	10	0	0	0	0	0	0	23.5897	0	12.5	0	46.7143	0	0	23.6364	0	0	21	0	0	0	0	0	0	0	0
Sitno	35.5636	0	44.6622	7.77778	3	5	0	0	0	0	18.4524	0	28	0	0	17.7778	0	0	5	11.3864	0	0	0	10.0909	0	0	0	0	0	0
Otalżyno	0	5	7.14286	0	32.156	0	0	0	0	0	0	62.5	11.6279	9.28571	0	23.3824	5.38462	0	0	0	8	0	0	0	0	0	0	21.3855	0	10
Dolskie	5	14	0	10.7471	0	0	0	0	0	0	0	0	15.4069	23.3333	0	59.5	20.5263	0	16.6562	10	0	0	0	0	0	0	0	0	0	6.66667
Nawionek	67.8135	0	0	0	0	0	0	0	0	0	0	0	0	13.9831	6.66667	0	43.5294	0	29.5025	0	0	10	0	0	10	0	0	0	0	0
Okoń Duży	0	0	0	0	0	28.2143	0	0	0	0	0	0	0	57.042	0	0	49.3893	59	0	0	0	10	0	0	0	0	0	0	0	0
Bobięciono Wielkie	0	0	0	0	21.0209	14.3529	0	0	0	13.9384	0	0	10	73.6953	0	83.7121	21.5217	0	12.5	0	0	0	0	0	0	0	0	0	0	0
Czarne Dąbrówno	0	43.4077	0	8.7451	0	8.85714	0	0	0	0	0	3.14286	9.55217	31.3391	0	2	11.1429	0	18.9187	0	0	6.05714	0	0	0	0	6	0	0	2
Moczadło near Sulęczyno	0	2	9.91935	0	0	0	0	0	0	0	0	2.61538	20.8857	19.8667	0	19.5294	22.2385	0	11.3988	0	0	10.5455	40	0	0	0	0	0	0	3.33333
Zawiat	0	14	1	0	0	17.5361	30.0455	0	0	0	0	2	7.14286	57.2656	0	14.7705	3.11475	0	0	0	0	0	0	0	0	0	0	0	0	0
Zakrzewie	2	5.33333	0	14.25	0	0	0	0	0	0	0	0	40	7.64706	0	0	37.2326	0	19.4731	0	0	4.66667	0	11.6345	6	0	4.18182	0	19.1176	0
Miemino	0	0	0	0	0	0	0	0	0	0	0	55.2	17.9184	11.3171	0	25.0233	12.3088	0	2	0	47.3333	13.5	7.81818	6.8	0	0	0	0	0	0
Karlikowskie	0	0	2.92308	0	0	0	0	0	0	0	0	0	7.33333	14.6957	0	23.95	2	62.5	0	0	1.62162	11.05	0	2	22.5098	0	0	0	0	2.10909
Małe Łowne	0	0	0	0	0	0	0	0	34.7462	68.1333	0	0	0	0	0	0	0	0	0	0	59.5588	0	0	0	0	0	0	0	0	0

## Sheet: Q
Species/trait	LDW [mg]	LA [mm2]	SLA [mm2/mg]	Circularity
Ceratophyllum demersum	0.238491	17.0403	99.92	0.039
Chara virgata	0.274956	8.75213	38.42	0.0478
Chara globularis	0.918182	13.7883	24.58	0.0869
Drepanocladus sordidus	0.003	0.85645	270.01	0.2888
Eleocharis acicularis	0.565541	26.5028	71.32	0.04538
Elodea canadensis	0.241667	31.3085	143.72	0.6981
Fontinalis antipyretica	0.10166	14.56	165.498	0.3829
Fontinalis dalecarlica	0.01	1.99	186.1	0.2859
Isoëtes lacustris	12.476	330.654	30.1429	0.0662
Juncus bulbosus	1.25517	110.966	118.41	0.0395
Littorella uniflora	3.77324	98.9622	39.18	0.176
Lobelia dortmanna	4.39722	138.848	32.1545	0.2222
Luronium natans /submerged leaves/	2.19167	227.149	122.09	0.0771
Myriophyllum alterniflorum	0.149167	39.3518	222.7	0.005
Myriophyllum spicatum	1.32234	153.269	104.29	0.0007
Nitella flexilis	0.137907	22.9446	79.4	0.0376
Nitellopsis obtusa	4.86	70.67	15.12	0.0432
Nuphar lutea	35731	4018	10.96	0.657
Persicaria amphibia	48.14	814.89	18.56	0.5781
Potamogeton crispus	5.0725	413.295	93.9	0.4149
Potamogeton gramineus /submerged leaves/	4.09	141.96	63.66	0.2119
Potamogeton natans	172.237	2960.03	17.2828	0.8266
Potamogeton obtusifolius	1.86842	231.058	123.46	0.0844
Potamogeton x nitens	4.91463	271.29	57.72	0.4973
Ranunculus reptans	1.502	58.55	39.47	0.0611
Sparganium angustifolium	79	2174.41	29.0952	0.1086
Sphagnum cuspidatum	0.005	1.647	338.48	0.3835
Sphagnum denticulatum	0.0266	7.184	334.7	0.5824
Stuckenia pectinata	0.970588	61.4495	64.58	0.0343
Warnstorfia exannulata	0.005	1.6214	330.8	0.1725
